# Supplementary material
Source: publisher figshare collection journal article supplement (https://acs.figshare.com/ndownloader/files/5931486)
Supplement: Supplementary file 1 [file 5931486]

# Supporting Information

## Thermoresponsive Polymer Micropatterns Fabricated by Dip-Pen Nanolithography for a Highly Controllable Substrate with Potential Cellular Applications

*By Stacey Laing,<sup>#†</sup> Raffaella Suriano,<sup>#‡</sup> Dimitrios A. Lamprou,<sup>§</sup> Carol-Anne Smith,<sup>†</sup>*

*Matthew J. Dalby,<sup>†</sup> Samuel Mabbott,<sup>‡</sup> Karen Faulds<sup>†</sup> and Duncan Graham<sup>\*†</sup>*

*# both authors contributed equally to this work*

<sup>†</sup> Centre for Molecular Nanometrology, Department of Pure and Applied Chemistry,  
Technology and Innovation Centre, University of Strathclyde, 99 George Street, Glasgow G1  
1RD, United Kingdom.

<sup>‡</sup> Department of Chemistry, Materials and Chemical Engineering “Giulio Natta”, Politecnico  
di Milano, Piazza Leonardo da Vinci 32, 20133 Milano, Italy.

<sup>§</sup> Strathclyde Institute of Pharmacy and Biomedical Sciences (SIPBS), University of  
Strathclyde, 161 Cathedral Street, Glasgow G4 0RE, United Kingdom. EPSRC Centre for  
Innovative Manufacturing in Continuous Manufacturing and Crystallisation (CMAC),

University of Strathclyde, Technology and Innovation Centre, 99 George Street, Glasgow G1  
1RD, United Kingdom.

|| Centre for Cell Engineering, Institute for Molecular, Cell and Systems Biology, University  
of Glasgow, Glasgow G12 8LT, United Kingdom.

Corresponding author: duncan.graham@strath.ac.uk

## SUPPORTING INFORMATION

To confirm the chemical composition of the DEAAm array spot, a Raman spectrum of the printed spot was obtained and compared to that of the bulk ink solution. Since the spectra of the bulk material and the printed spot differed significantly, spectra were also collected for each of the other components of the ink. Figure S1 shows that the Raman spectrum of the printed spot is very similar to that of the PEG-DMA crosslinker, indicating that the spot is composed of PEG-DMA. The absence of bands characteristic of DEAAm confirms that the DEAAm has evaporated during the printing process.

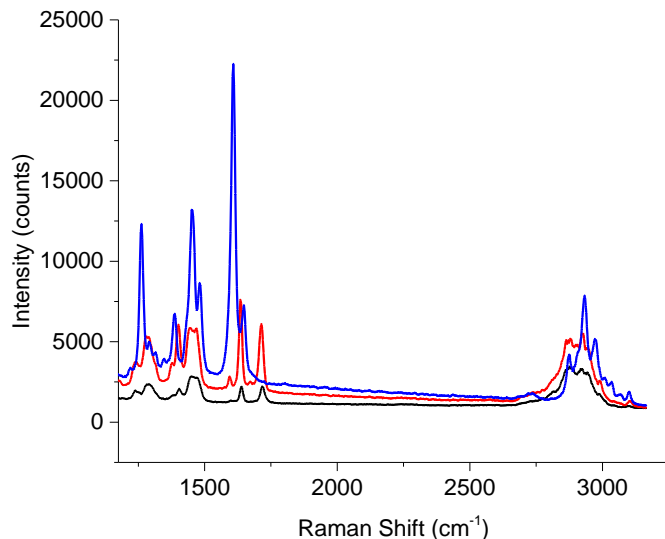

**Figure S1.** Raman spectra of the printed spot of DEAAm (black) the PEG-DMA crosslinker (red) and the whole ink solution (blue). Spectra were collected using a 633 nm laser excitation wavelength with 5 x 10 second accumulations.

Table S1 compares the bands present in the Raman spectra of the array spots and the bulk material for both the Jeffamine and the Jeffamine/DEAAm ink systems. Approximate assignments are suggested for each of the Raman bands.

**Table S1.** Assignment of Raman vibrations for bulk material and array spots of both Jeffamine and Jeffamine/DEAAM.

| <b>Band assignment</b>                           | <b>Jeffamine<br/>bulk<br/>material<br/>(cm<sup>-1</sup>)</b> | <b>Jeffamine<br/>array<br/>spot<br/>(cm<sup>-1</sup>)</b> | <b>Jeffamine/<br/>DEAAM<br/>bulk material<br/>(cm<sup>-1</sup>)</b> | <b>Jeffamine/<br/>DEAAM<br/>array spot<br/>(cm<sup>-1</sup>)</b> |
|--------------------------------------------------|--------------------------------------------------------------|-----------------------------------------------------------|---------------------------------------------------------------------|------------------------------------------------------------------|
| <b>CH<sub>2</sub>/CH<sub>3</sub> deformation</b> |                                                              |                                                           |                                                                     |                                                                  |
| symmetric Si-CH <sub>3</sub>                     | 1256                                                         | 1257                                                      | 1263                                                                | 1251                                                             |
| asymmetric/symmetric O-CH                        | 1458                                                         | 1457                                                      | 1456                                                                | 1461                                                             |
| <b>C-O-C stretching</b>                          | 1293                                                         | 1296                                                      | 1284                                                                | 1296                                                             |
| <b>N-H deformation</b>                           | 1611-1641                                                    | 1605-1642                                                 |                                                                     | 1601 & 1642                                                      |
| <b>C=C &amp; C=O stretching</b>                  |                                                              |                                                           | 1615 & 1673                                                         |                                                                  |
| <b>Aliphatic CH stretching</b>                   |                                                              |                                                           |                                                                     |                                                                  |
| Symmetric                                        | 2874                                                         | 2882                                                      | 2892 & 2875                                                         | 2889 & 2873                                                      |
| Asymmetric                                       | 2919                                                         | 2918                                                      | 2970 & 2972                                                         | 2919 & 1927                                                      |
